# Supplementary material for: A comparative study on sample preparation procedures for supplementary foods by ICP-OES: Green chemistry considerations
Source: Royal Society of Chemistry journal article supplement (doi:10.1039/c5ay00397k), 2015-01-01
Supplement: c5ay00397k1.pdf [file c5ay00397k1.pdf]

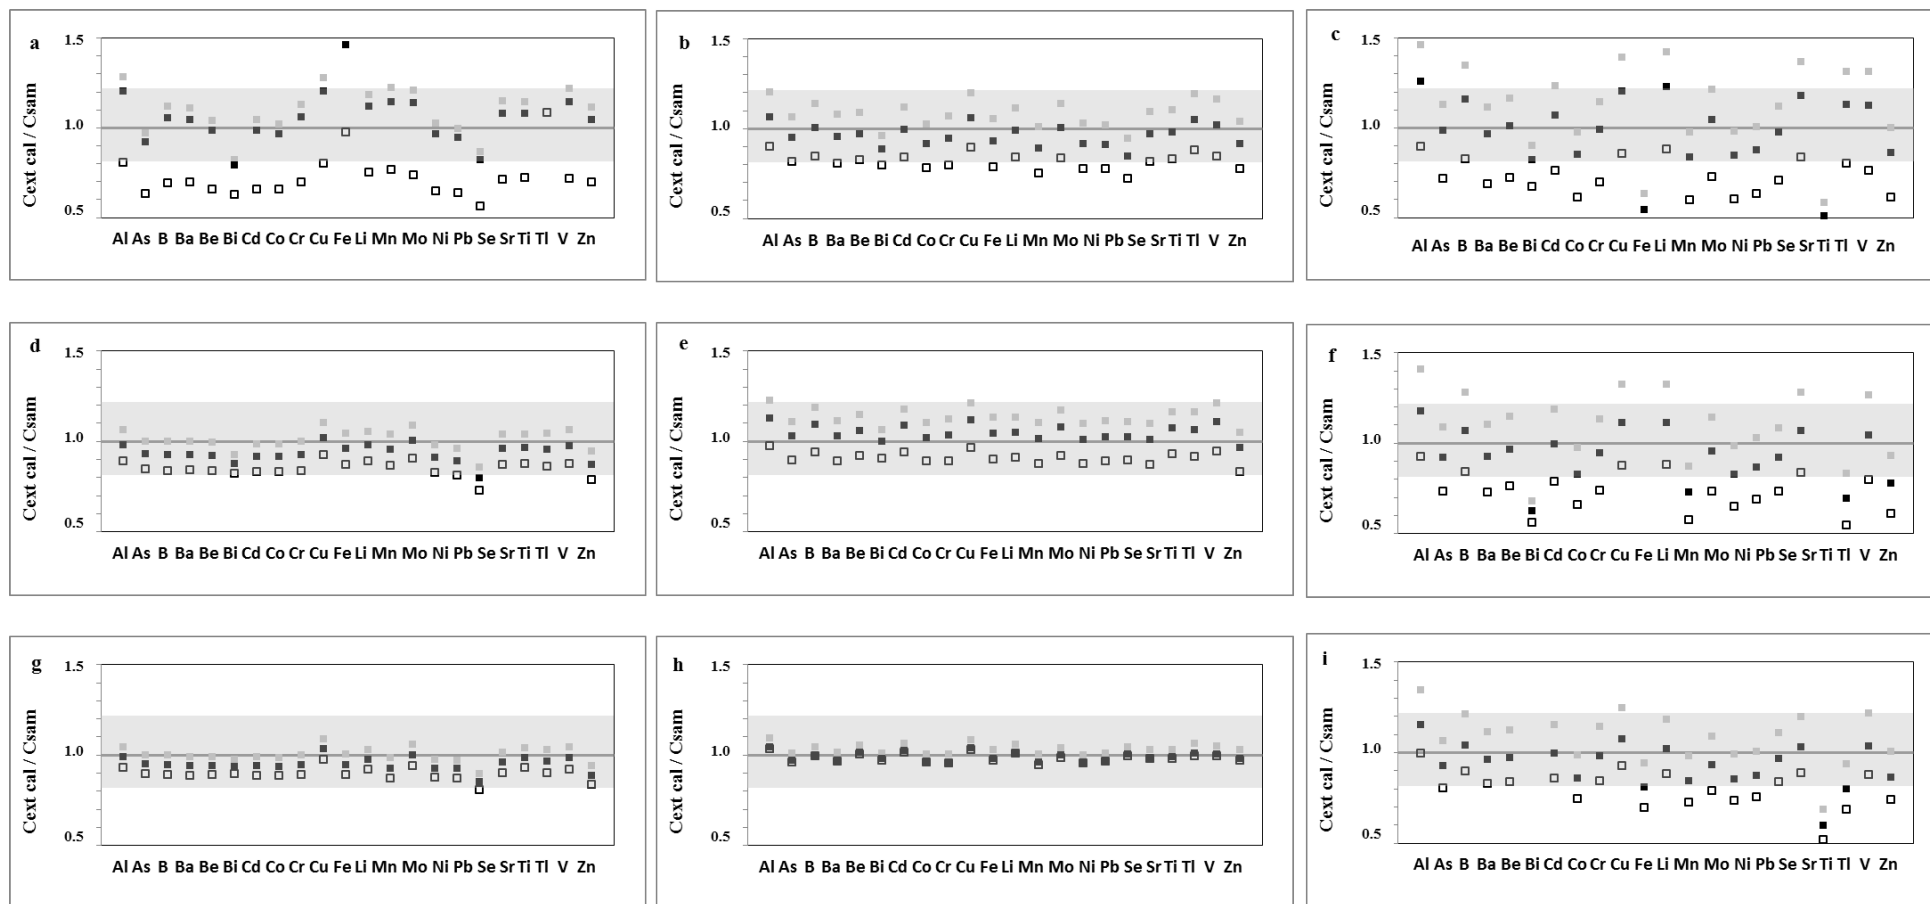

**Supplementary 1.** Ratio between concentrations obtained by using external calibration ( $C_{\text{ext cal}}$ ) and the standard addition method ( $C_{\text{sam}}$ ) of a supplementary food sample after a) microwave acid digestion-undiluted sample, b) dry ashing-undiluted sample, c) dry ashing with ashing aid -undiluted sample, d) microwave acid digestion-dilution 1:1, e) dry ashing- dilution 1:1, f) dry ashing with ashing aid -dilution 1:1, g) microwave acid digestion-dilution 1:3, h) dry ashing- dilution 1:3, i) dry ashing with ashing aid -dilution 1:3. ICP-OES measurements in all the cases without using internal standard ( $\square$ ), with Re ( $\blacksquare$ ) or Ru ( $\blacksquare$ ).

**Supplementary 2.** Effect of dilution factor of digested supplementary foods on concentrations (mg kg<sup>-1</sup>) obtained by ICP-OES after microwave digestion

|    | undiluted | 1:1  | 1:3  |
|----|-----------|------|------|
| Al | 21.6      | 21.2 | 21.2 |
| B  | 5.5       | 5.5  | 5.3  |
| Ba | 7.0       | 6.8  | 6.3  |
| Ca | 692       | 688  | 682  |
| Co | 0.6       | 0.4  | nd   |
| Cr | 4.4       | 4.3  | 3.8  |
| Cu | 8.2       | 8.0  | 7.8  |
| Dy | nd        | nd   | nd   |
| Er | 1.3       | 1.2  | 1.1  |
| Fe | 95.3      | 96.7 | 98.4 |
| Gd | 0.2       | nd   | nd   |
| K  | 8010      | 7860 | 7750 |
| La | 1.2       | 0.9  | 0.1  |
| Li | nd        | nd   | nd   |
| Mg | 2250      | 2220 | 2210 |
| Mn | 83.5      | 83.9 | 85.1 |
| Mo | 0.1       | nd   | nd   |
| Na | 80        | 80   | 80   |
| Pb | 6.1       | 6.5  | 6.3  |
| Se | nd        | nd   | nd   |
| Sn | 37.9      | 40.1 | 39.3 |
| Sr | 3.5       | 2.8  | nd   |
| Ti | 0.7       | 0.6  | 0.4  |
| V  | 1.0       | 1.0  | nd   |
| Y  | nd        | nd   | nd   |
| Zn | 57.2      | 59.4 | 61.1 |

0.5 g of dry sample was digested in microwave oven with HNO<sub>3</sub> and H<sub>2</sub>O<sub>2</sub>. Final volume was made to 25 mL. 50 mL or 100 mL.

**Supplementary 3.** Effect of dilution factor of digested supplementary foods on concentrations (mg kg<sup>-1</sup>) obtained by ICP-OES after dry ashing

|    | undiluted | 1:1  | 1:3  |
|----|-----------|------|------|
| Al | 3.1       | 3.0  | nd   |
| B  | nd        | nd   | nd   |
| Ba | 7.0       | 7.0  | 6.8  |
| Ca | 602       | 629  | 654  |
| Co | 0.5       | 0.5  | nd   |
| Cr | 0.6       | 0.6  | nd   |
| Cu | 7.6       | 7.4  | 7.2  |
| Dy | 0.1       | 0.1  | nd   |
| Er | 0.6       | 0.6  | 0.5  |
| Fe | 68.0      | 68.7 | 69.2 |
| Gd | 0.2       | 0.2  | 0.3  |
| K  | 5000      | 5040 | 5000 |
| La | 0.9       | 0.9  | 0.7  |
| Li | 1.0       | 0.9  | 0.8  |
| Mg | -         | -    | -    |
| Mn | 79.0      | 80.0 | 80.5 |
| Mo | 0.3       | nd   | nd   |
| Na | 1260      | 1300 | 1320 |
| Pb | 5.9       | 6.0  | 6.1  |
| Se | 3.1       | 3.5  | 4.9  |
| Sn | 27.4      | 31.1 | 28.1 |
| Sr | 3.4       | 3.2  | 2.7  |
| Ti | 0.2       | 0.1  | 0.1  |
| V  | 0.6       | 0.7  | 0.5  |
| Y  | 0.0       | 0.1  | nd   |
| Zn | 58.7      | 60.1 | 61.9 |

1 g of dry sample was dry assed in muffle furnace. Ashes were diluted in HCl and final volume was made to 20 mL, 40 mL or 80 mL.

**Supplementary 4.** Concentration of minerals in method blanks obtained from different sample treatments in supplementary foods analysis by ICP-OES

|    | Microwave acid digestion | Dry ashing    | Dry ashing with ashing aid |
|----|--------------------------|---------------|----------------------------|
| Al | nq                       | nq            | 17.3 ± 0.3                 |
| B  | nq                       | nq            | 30.3 ± 0.6                 |
| Ca | nq                       | nq            | 490 ± 4                    |
| Fe | nq                       | nq            | 7.9 ± 0.7                  |
| Mg | nq                       | nq            | 46700 ± 200                |
| Mn | nq                       | nq            | 1.100 ± 0.004              |
| Na | 64.3 ± 0.7               | nq            | Nq                         |
| Ni | nq                       | nq            | 17.9 ± 0.3                 |
| Sr | nq                       | 0.020 ± 0.002 | 1.503 ± 0.018              |
| Ti | nq                       | 0.068 ± 0.003 | 0.309 ± 0.017              |

Data expressed in  $\mu\text{g g}^{-1}$  as the mean ( $\pm$  standard deviation) of three independent analysis performed using the primary recommended conditions for ICP-OES.
